# Supplementary material for: A high-throughput behavioral screening platform for measuring chemotaxis by C. elegans
Source: PubMed Central journal article supplement (PMC11210793; doi:10.1371/journal.pbio.3002672), 2024-06-27
Supplement: pbio.3002672.s003.pdf [file pbio.3002672.s003.pdf]

| CAS ID      | Compound                 | Vendor    | Catalogue # |
|-------------|--------------------------|-----------|-------------|
| 0431-03-08  | Diacetyl                 | TCI       | B0682       |
| 0483-04-5   | Ajmalicine               | Cayman    | 31213       |
| 0491-09-8   | Piperitenone             | Cayman    | 25752       |
| 100-09-4    | p-Anisic acid            | MCE       | HY-N1394    |
| 100-66-3    | Anisole                  | Sigma     | 123226      |
| 102518-79-6 | (-)-Huperzine A          | MCE       | HY-W019711  |
| 104-54-1    | Cinnamyl Alcohol         | MCE       | HY-Y0078    |
| 104-87-0    | p-Tolualdehyde           | MCE       | HY-W012860  |
| 105-87-3    | Geranyl Acetate          | Ambeed    | A404343     |
| 106-22-9    | Citronellol              | MCE       | HY-W010201  |
| 106-22-9    | $\beta$ -Citronellol     | TCI       | C0370       |
| 107-35-7    | Taurine                  | MCE       | HY-B0351    |
| 110-02-1    | Thiophene                | TCI       | T0223       |
| 111-87-5    | 1-octanol                | Sigma     | 297877      |
| 112-14-1    | Octyle acetate           | TCI       | A0042       |
| 112-39-0    | Methyl palmitate         | TCI       | P0006       |
| 116-26-7    | Safranal                 | MCE       | HY-N7560    |
| 1180-71-8   | Limonin                  | MCE       | HY-17411    |
| 119-65-3    | Isoquinoline             | MCE       | HY-W012732  |
| 120-57-0    | Piperonyl Alcohol        | Sigma     | P49104      |
| 123-11-5    | p-anisaldehyde           | TCI       | A1674       |
| 123-35-3    | Myrcene                  | Sigma     | M100005     |
| 123-51-3    | Isoamyl alcohol          | Sigma     | W205710     |
| 124-20-9    | Spermidine               | MCE       | HY-B1776    |
| 126-17-0    | Solasodine (p)           | MCE       | HY-N0068    |
| 137-32-6    | 2-Methyl-1-butanol       | Sigma     | 133051      |
| 14371-10-9  | trans-Cinnamaldehyde     | MCE       | HY-W019711  |
| 1490-04-6   | Menthol                  | MCE       | HY-N1369    |
| 150-86-7    | Phytol                   | MCE       | HY-N3075    |
| 16409-43-1  | L-Mimosine               | Apex      | B4751       |
| 168316-95-8 | Spinosad (p)             | Cayman    | 25649       |
| 18524-94-2  | Loganin                  | MCE       | HY-N0512    |
| 18836-52-7  | Pellitorine (p)          | Cayman    | 11662       |
| 19431-84-6  | Curcumenol               | MCE       | HY-N2259    |
| 20283-92-5  | Rosmarinic acid          | MCE       | HY-N0529    |
| 2068-78-2   | Vincristine (sulfate)    | MCE       | HY-N0488    |
| 2244-16-8   | (+)-Carvone              | Sigma     | 22070       |
| 23180-57-6  | Paeoniflorin             | MCE       | HY-N0293    |
| 23800-56-8  | Pogostone                | MCE       | HY-N1416    |
| 24393-56-4  | Ethyl p-methoxycinnamate | Cayman    | 11740       |
| 24697-74-3  | Leonurine                | MCE       | HY-N0741    |
| 2482-00-0   | Agmatine                 | Chemimpex | 10668       |
| 3387-41-5   | Sabinene                 | MCE       | HY-108943   |
| 357-70-0    | Galanthamine             | MCE       | HY-76299    |
| 3650-09-7   | Carnosic acid            | MCE       | HY-N0644    |
| 372-75-8    | L-Citrulline             | MCE       | HY-N0391    |
| 37839-63-7  | Germacrene D             | Aobious   | CFN93281    |
| 4180-23-8   | Trans-Anethole           | MCE       | HY-N0367    |

| CAS ID      | Compound                              | Vendor    | Catalogue # |
|-------------|---------------------------------------|-----------|-------------|
| 4373-41-5   | Maslinic acid (p)                     | MCE       | HY-N0629    |
| 462-94-2    | Cadaverine                            | Sigma     | 52063       |
| 464-45-9    | (-)-Borneol                           | TCI       | B1012       |
| 4674-50-4   | Nootkatone                            | MCE       | HY-N2195    |
| 469-61-4    | (-)-Cedrene                           | MCE       | HY-135190   |
| 469-83-0    | Cafestol                              | MCE       | HY-N6257    |
| 470-82-6    | Eucalyptol                            | Sigma     | C80601      |
| 474-58-8    | Daucosterol (p)                       | MCE       | HY-N0410    |
| 474-58-8    | Sitogluside (p)                       | Targetmol | T3871       |
| 476-66-4    | Ellagic acid (p)                      | MCE       | HY-B0183    |
| 484-20-8    | Bergapten (p)                         | MCE       | HY-N0370    |
| 489-84-9    | Guaiazulene                           | Cayman    | 31506       |
| 490-79-9    | 2,5-Dihydroxybenzoic acid             | MCE       | HY-W001179  |
| 496-16-2    | Coumaran                              | MCE       | HY-75247    |
| 496-16-2    | 2,3-Dihydrobenzofuran                 | TCI       | D1583       |
| 499-75-2    | Carvacrol                             | MCE       | HY-N0711    |
| 508-02-01   | Oleanolic Acid (p)                    | MCE       | HY-N0156    |
| 520-18-3    | Kaempferol                            | MCE       | HY-14590    |
| 520-36-5    | Apigenin (p)                          | MCE       | HY-N1201    |
| 522-17-8    | Deguelin (p)                          | MCE       | HY-13425    |
| 532-11-6    | Anethole trithione (p)                | MCE       | HY-B1223    |
| 536-74-3    | Phenylacetylene                       | Sigma     | 117706      |
| 5451-09-2   | 5-Aminolevulinic acid (hydrochloride) | MCE       | HY-W000450  |
| 55396-45-7  | 2-Nonylquinolin-4(1H)-one (p)         | Cayman    | 9003627     |
| 5784-74-7   | Salsolidine                           | MCE       | HY-22385    |
| 58-08-2     | Caffeine                              | Sigma     | C0750       |
| 5957-80-2   | Carnosol                              | MCE       | HY-N0643    |
| 6080-33-7   | Sinomenine hydrochloride              | MCE       | HY-15122    |
| 628-97-7    | Ethyl palmitate                       | MCE       | HY-N2086    |
| 646-23-1    | Alyssin                               | Cayman    | 31513       |
| 67-68-5     | DMSO                                  | VWR       | N182        |
| 68370-47-8  | Micheliolide                          | MCE       | HY-N0847    |
| 689295-71-4 | Salvinorin A Propionate (p)           | Cayman    | 22290       |
| 69-72-7     | Salicylic acid                        | MCE       | HY-B0167    |
| 70-26-8     | L-Ornithine                           | MCE       | HY-B1352    |
| 7212-44-4   | Nerolidol                             | MCE       | HY-N1944    |
| 76-22-2     | Camphor                               | MCE       | HY-N0808    |
| 77-52-1     | Ursolic acid (p)                      | MCE       | HY-N0140    |
| 821-55-6    | 2-nonanone                            | TCI       | N093        |
| 83-34-1     | Skatole                               | MCE       | HY-W007355  |
| 83-79-4     | Rotenone (p)                          | MCE       | HY-B1756    |
| 84-79-7     | Lapachol                              | MCE       | HY-N6961    |
| 87-44-5     | Beta caryophyllene                    | TCI       | C0796       |
| 94-62-2     | Piperine (p)                          | MCE       | HY-N0144    |
| 98-01-1     | Furfural                              | TCI       | F0073       |
| 98-86-2     | Acetophenone                          | MCE       | HY-Y0989    |
| 99-83-2     | $\alpha$ -Phellandrene                | Cayman    | 23179       |
|             | Water                                 | NA        | NA          |
