# Supplementary material for: A high-throughput behavioral screening platform for measuring chemotaxis by C. elegans
Source: PubMed Central journal article supplement (PMC11210793; doi:10.1371/journal.pbio.3002672), 2024-06-27
Supplement: pbio.3002672.s004.pdf [file pbio.3002672.s004.pdf]

| Test_compound                 | Reference | Test_n | Mean_difference | CI_5   | CI_95  | p_value  | BH_correction_0.05 |
|-------------------------------|-----------|--------|-----------------|--------|--------|----------|--------------------|
| Isoamyl alcohol               | DMSO      | 502    | 14.167          | 12.82  | 15.512 | 1.35E-94 | 0.0005             |
| 2-Methyl-1-butanol            | DMSO      | 381    | 11.712          | 9.891  | 13.409 | 6.39E-39 | 0.001              |
| Thiophene                     | DMSO      | 706    | 9.76            | 8.202  | 11.263 | 7.61E-36 | 0.0016             |
| *2,3-Dihydrobenzofuran        | DMSO      | 705    | 9.194           | 7.63   | 10.674 | 2.43E-32 | 0.0021             |
| Diacetyl                      | DMSO      | 796    | 8.019           | 6.59   | 9.361  | 7.99E-30 | 0.0026             |
| Phenylacetylene               | DMSO      | 496    | 6.45            | 4.656  | 8.165  | 5.75E-13 | 0.0042             |
| Paeoniflorin                  | DMSO      | 556    | 5.382           | 3.587  | 7.05   | 1.12E-09 | 0.0073             |
| alpha-Phellandrene            | DMSO      | 777    | 5.368           | 3.801  | 6.836  | 4.13E-12 | 0.0047             |
| Acetophenone                  | DMSO      | 755    | 5.238           | 3.649  | 6.776  | 5.14E-11 | 0.0052             |
| *Coumaran                     | DMSO      | 754    | 4.93            | 3.386  | 6.361  | 8.19E-11 | 0.0057             |
| Leonurine                     | DMSO      | 766    | 4.534           | 3.003  | 6.077  | 7.39E-09 | 0.0078             |
| Guaiazulene                   | DMSO      | 958    | 4.305           | 2.961  | 5.685  | 5.86E-10 | 0.0063             |
| L-Mimosine                    | DMSO      | 916    | 4.282           | 2.806  | 5.731  | 9.49E-09 | 0.0083             |
| Solasodine (p)                | DMSO      | 826    | 3.821           | 2.257  | 5.414  | 2.10E-06 | 0.0099             |
| Isoquinoline                  | DMSO      | 836    | 3.807           | 2.368  | 5.358  | 5.97E-07 | 0.0094             |
| Furfural                      | DMSO      | 796    | 3.619           | 2.048  | 5.138  | 4.40E-06 | 0.0104             |
| (-)-Huperzine A               | DMSO      | 911    | 3.378           | 1.87   | 4.772  | 5.08E-06 | 0.0109             |
| Anisole                       | DMSO      | 858    | 3.017           | 1.461  | 4.546  | 1.27E-04 | 0.012              |
| Limonin                       | DMSO      | 907    | 2.823           | 1.348  | 4.346  | 2.23E-04 | 0.0141             |
| Cinnamyl alcohol              | DMSO      | 857    | 2.814           | 1.287  | 4.297  | 2.47E-04 | 0.0146             |
| Piperitenone                  | DMSO      | 951    | 2.707           | 1.319  | 4.16   | 1.88E-04 | 0.0135             |
| Ethyl palmitate               | DMSO      | 887    | 2.574           | 1.056  | 4.11   | 9.54E-04 | 0.0161             |
| Carnosol                      | DMSO      | 930    | 2.521           | 1.026  | 3.964  | 7.70E-04 | 0.0151             |
| 2,5-Dihydroxybenzoic acid     | DMSO      | 971    | 2.463           | 0.976  | 3.874  | 8.65E-04 | 0.0156             |
| p-Tolualdehyde                | DMSO      | 873    | 2.406           | 0.921  | 3.839  | 0.0012   | 0.0172             |
| Lapachol                      | DMSO      | 811    | 2.354           | 0.861  | 3.925  | 0.0026   | 0.0177             |
| Piperonyl alcohol             | DMSO      | 1008   | 2.29            | 0.901  | 3.674  | 0.0012   | 0.0167             |
| Sabinene                      | DMSO      | 823    | 2.166           | 0.574  | 3.714  | 0.0069   | 0.0198             |
| Cadaverine                    | DMSO      | 788    | 2.056           | 0.42   | 3.664  | 0.013    | 0.0219             |
| Sinomenine hydrochloride      | DMSO      | 883    | 2.01            | 0.481  | 3.531  | 0.0098   | 0.0214             |
| (-)-Cedrene                   | DMSO      | 1036   | 2.003           | 0.494  | 3.446  | 0.0078   | 0.0203             |
| Pellitorine (p)               | DMSO      | 846    | 1.956           | 0.431  | 3.553  | 0.014    | 0.0229             |
| Piperine (p)                  | DMSO      | 787    | 1.949           | 0.41   | 3.518  | 0.014    | 0.0224             |
| ^beta-Citronellol             | DMSO      | 860    | 1.904           | 0.47   | 3.345  | 0.0094   | 0.0208             |
| Geranyl acetate               | DMSO      | 890    | 1.807           | 0.275  | 3.329  | 0.0204   | 0.0245             |
| Apigenin (p)                  | DMSO      | 754    | 1.761           | 0.114  | 3.355  | 0.0332   | 0.0266             |
| Salsolidine                   | DMSO      | 748    | 1.706           | 0.113  | 3.244  | 0.0327   | 0.0255             |
| 4-Methoxybenzaldehyde         | DMSO      | 901    | 1.652           | 0.205  | 3.117  | 0.0262   | 0.025              |
| Nerolidol                     | DMSO      | 781    | 1.556           | 0.112  | 3.041  | 0.0373   | 0.0271             |
| 2-Nonylquinolin-4(1H)-one (p) | DMSO      | 803    | 1.511           | 0.051  | 2.933  | 0.0398   | 0.0276             |
| Caffeine                      | DMSO      | 859    | 1.427           | -0.098 | 2.869  | 0.0595   | 0.0281             |
| Agmatine                      | DMSO      | 764    | 1.415           | -0.229 | 2.992  | 0.0852   | 0.0297             |
| Rotenone (p)                  | DMSO      | 865    | 1.405           | -0.153 | 2.948  | 0.0757   | 0.0286             |
| Menthol                       | DMSO      | 928    | 1.359           | -0.159 | 2.899  | 0.0815   | 0.0292             |
| ^Citronellol                  | DMSO      | 767    | 1.28            | -0.217 | 2.766  | 0.0927   | 0.0302             |
| (+)-Carvone                   | DMSO      | 1052   | 1.122           | -0.31  | 2.58   | 0.1279   | 0.0313             |
| Spermidine                    | DMSO      | 977    | 0.904           | -0.559 | 2.389  | 0.2292   | 0.0318             |
| †Sitogluside (p)              | DMSO      | 993    | 0.802           | -0.787 | 2.277  | 0.3046   | 0.0349             |

|                                       |      |      |        |        |        |          |        |
|---------------------------------------|------|------|--------|--------|--------|----------|--------|
| Ajmalicine                            | DMSO | 864  | 0.798  | -0.724 | 2.329  | 0.3057   | 0.0354 |
| Maslinic acid (p)                     | DMSO | 879  | 0.791  | -0.692 | 2.348  | 0.3075   | 0.0365 |
| 5-Aminolevulinic acid (hydrochloride) | DMSO | 838  | 0.779  | -0.658 | 2.288  | 0.3001   | 0.0344 |
| Nootkatone                            | DMSO | 963  | 0.671  | -0.795 | 2.107  | 0.3645   | 0.0375 |
| Alyssin                               | DMSO | 970  | 0.601  | -0.857 | 2.071  | 0.421    | 0.0396 |
| Eucalyptol                            | DMSO | 853  | 0.549  | -1.033 | 2.06   | 0.4862   | 0.0406 |
| Carnosic acid                         | DMSO | 797  | 0.534  | -1.109 | 2.127  | 0.5174   | 0.0411 |
| Skatole                               | DMSO | 978  | 0.436  | -1.005 | 1.948  | 0.5629   | 0.0417 |
| Water                                 | DMSO | 915  | 0.418  | -1.043 | 1.889  | 0.5758   | 0.0422 |
| trans-Anethole                        | DMSO | 963  | 0.346  | -1.117 | 1.851  | 0.6473   | 0.0432 |
| Rosmarinic acid                       | DMSO | 802  | 0.318  | -1.193 | 1.89   | 0.6859   | 0.0448 |
| Vincristine (sulfate)                 | DMSO | 625  | 0.23   | -1.497 | 1.953  | 0.7935   | 0.0458 |
| Galanthamine                          | DMSO | 886  | 0.203  | -1.288 | 1.744  | 0.7931   | 0.0453 |
| L-Citrulline                          | DMSO | 883  | 0.129  | -1.363 | 1.701  | 0.8688   | 0.0469 |
| Salicylic acid                        | DMSO | 1058 | 0.082  | -1.329 | 1.516  | 0.9101   | 0.0474 |
| Bergapten (p)                         | DMSO | 806  | 0.079  | -1.512 | 1.704  | 0.9231   | 0.0479 |
| Deguelin (p)                          | DMSO | 972  | 0.051  | -1.425 | 1.597  | 0.9472   | 0.049  |
| trans-Cinnamaldehyde                  | DMSO | 879  | 0.043  | -1.444 | 1.598  | 0.9555   | 0.0495 |
| Curcumenol                            | DMSO | 1045 | -0.055 | -1.488 | 1.424  | 0.9415   | 0.0484 |
| Taurine                               | DMSO | 985  | -0.151 | -1.61  | 1.341  | 0.841    | 0.0464 |
| Cafestol                              | DMSO | 1046 | -0.31  | -1.719 | 1.135  | 0.6699   | 0.0443 |
| Pogostone                             | DMSO | 856  | -0.356 | -1.886 | 1.211  | 0.6522   | 0.0438 |
| Loganin                               | DMSO | 928  | -0.403 | -1.956 | 1.024  | 0.5962   | 0.0427 |
| Kaempferol                            | DMSO | 999  | -0.579 | -2.004 | 0.854  | 0.4269   | 0.0401 |
| L-Ornithine                           | DMSO | 908  | -0.61  | -2.117 | 0.831  | 0.4174   | 0.0391 |
| Anethole trithione (p)                | DMSO | 926  | -0.628 | -2.084 | 0.863  | 0.4035   | 0.0385 |
| Carvacrol                             | DMSO | 935  | -0.65  | -2.091 | 0.8    | 0.3781   | 0.038  |
| Beta caryophyllene                    | DMSO | 1041 | -0.75  | -2.169 | 0.597  | 0.2881   | 0.0333 |
| Germacrene D                          | DMSO | 1158 | -0.754 | -2.252 | 0.595  | 0.2992   | 0.0339 |
| Micheliolide                          | DMSO | 808  | -0.762 | -2.259 | 0.733  | 0.3184   | 0.037  |
| (-)-Borneol                           | DMSO | 867  | -0.793 | -2.327 | 0.716  | 0.3073   | 0.0359 |
| Octyle acetate                        | DMSO | 859  | -0.875 | -2.397 | 0.677  | 0.2646   | 0.0328 |
| Myrcene                               | DMSO | 769  | -0.923 | -2.505 | 0.62   | 0.2472   | 0.0323 |
| p-Anisic acid                         | DMSO | 1024 | -1.168 | -2.624 | 0.314  | 0.1191   | 0.0307 |
| Oleanolic acid (p)                    | DMSO | 730  | -1.76  | -3.362 | -0.125 | 0.033    | 0.026  |
| †Daucosterol (p)                      | DMSO | 804  | -1.885 | -3.467 | -0.321 | 0.0189   | 0.024  |
| Ethyl p-methoxycinnamate              | DMSO | 751  | -1.895 | -3.396 | -0.335 | 0.0152   | 0.0234 |
| Methyl palmitate                      | DMSO | 935  | -1.978 | -3.418 | -0.567 | 0.0065   | 0.0193 |
| Safranal                              | DMSO | 848  | -2.081 | -3.542 | -0.589 | 0.0057   | 0.0188 |
| Ursolic acid (p)                      | DMSO | 884  | -2.229 | -3.737 | -0.737 | 0.0036   | 0.0182 |
| Camphor                               | DMSO | 941  | -2.756 | -4.166 | -1.342 | 1.30E-04 | 0.0125 |
| Spinosad (p)                          | DMSO | 900  | -2.797 | -4.28  | -1.379 | 1.57E-04 | 0.013  |
| Salvinorin A propionate (p)           | DMSO | 926  | -3.313 | -4.793 | -1.847 | 1.04E-05 | 0.0115 |
| Ellagic acid (p)                      | DMSO | 890  | -3.744 | -5.184 | -2.379 | 1.68E-07 | 0.0089 |
| 2-Nonanone                            | DMSO | 867  | -4.576 | -6.02  | -3.097 | 8.42E-10 | 0.0068 |
| Phytol                                | DMSO | 625  | -6.249 | -7.8   | -4.623 | 1.27E-14 | 0.0036 |
| 1-Octanol                             | DMSO | 652  | -7.446 | -8.945 | -5.917 | 5.39E-22 | 0.0031 |
| Isoamyl alcohol                       | H2O  | 502  | 13.749 | 12.342 | 15.152 | 5.67E-82 | 0.0005 |
| 2-Methyl-1-butanol                    | H2O  | 381  | 11.294 | 9.483  | 13.039 | 1.41E-35 | 0.001  |

|                                       |     |      |       |        |        |          |        |
|---------------------------------------|-----|------|-------|--------|--------|----------|--------|
| Thiophene                             | H2O | 706  | 9.341 | 7.723  | 10.903 | 1.12E-30 | 0.0016 |
| *2,3-Dihydrobenzofuran                | H2O | 705  | 8.776 | 7.138  | 10.356 | 1.12E-26 | 0.0021 |
| Diacetyl                              | H2O | 796  | 7.6   | 6.171  | 9.055  | 5.01E-25 | 0.0026 |
| Phenylacetylene                       | H2O | 496  | 6.032 | 4.136  | 7.734  | 4.99E-11 | 0.0042 |
| Paeoniflorin                          | H2O | 556  | 4.963 | 3.159  | 6.769  | 7.07E-08 | 0.0073 |
| alpha-Phellandrene                    | H2O | 777  | 4.949 | 3.271  | 6.52   | 2.34E-09 | 0.0052 |
| Acetophenone                          | H2O | 755  | 4.82  | 3.18   | 6.423  | 5.69E-09 | 0.0057 |
| *Coumaran                             | H2O | 754  | 4.512 | 2.942  | 6.024  | 9.54E-09 | 0.0063 |
| Leonurine                             | H2O | 766  | 4.115 | 2.436  | 5.682  | 6.67E-07 | 0.0089 |
| Guaiazulene                           | H2O | 958  | 3.886 | 2.422  | 5.379  | 2.60E-07 | 0.0078 |
| L-Mimosine                            | H2O | 916  | 3.864 | 2.354  | 5.385  | 5.83E-07 | 0.0083 |
| Solasodine (p)                        | H2O | 826  | 3.402 | 1.843  | 4.984  | 2.17E-05 | 0.0099 |
| Isoquinoline                          | H2O | 836  | 3.389 | 1.76   | 4.888  | 2.17E-05 | 0.0104 |
| Furfural                              | H2O | 796  | 3.201 | 1.56   | 4.793  | 1.04E-04 | 0.012  |
| (-)-Huperzine A                       | H2O | 911  | 2.96  | 1.392  | 4.435  | 1.38E-04 | 0.0125 |
| Anisole                               | H2O | 858  | 2.598 | 0.981  | 4.142  | 0.0013   | 0.0141 |
| Limonin                               | H2O | 907  | 2.404 | 0.847  | 3.964  | 0.0025   | 0.0151 |
| Cinnamyl alcohol                      | H2O | 857  | 2.395 | 0.771  | 3.941  | 0.0031   | 0.0156 |
| Piperitenone                          | H2O | 951  | 2.288 | 0.791  | 3.827  | 0.0031   | 0.0161 |
| Ethyl palmitate                       | H2O | 887  | 2.156 | 0.531  | 3.782  | 0.0093   | 0.0193 |
| Carnosol                              | H2O | 930  | 2.102 | 0.485  | 3.611  | 0.0084   | 0.0182 |
| 2,5-Dihydroxybenzoic acid             | H2O | 971  | 2.045 | 0.514  | 3.517  | 0.0076   | 0.0177 |
| p-Tolualdehyde                        | H2O | 873  | 1.987 | 0.397  | 3.483  | 0.0116   | 0.0203 |
| Lapachol                              | H2O | 811  | 1.936 | 0.308  | 3.582  | 0.0205   | 0.0208 |
| Piperonyl alcohol                     | H2O | 1008 | 1.872 | 0.43   | 3.297  | 0.0105   | 0.0198 |
| Sabinene                              | H2O | 823  | 1.747 | 0.129  | 3.39   | 0.0357   | 0.0214 |
| Cadaverine                            | H2O | 788  | 1.637 | -0.068 | 3.252  | 0.0532   | 0.0234 |
| Sinomenine hydrochloride              | H2O | 883  | 1.592 | 0.016  | 3.156  | 0.0469   | 0.0229 |
| (-)-Cedrene                           | H2O | 1036 | 1.584 | -0.021 | 3.08   | 0.0452   | 0.0224 |
| Pellitorine (p)                       | H2O | 846  | 1.538 | -0.211 | 3.091  | 0.0679   | 0.025  |
| Piperine (p)                          | H2O | 787  | 1.531 | -0.104 | 3.112  | 0.0621   | 0.0245 |
| ^beta-Citronellol                     | H2O | 860  | 1.486 | -0.115 | 2.991  | 0.0608   | 0.024  |
| Geranyl acetate                       | H2O | 890  | 1.388 | -0.257 | 2.948  | 0.0895   | 0.0255 |
| Apigenin (p)                          | H2O | 754  | 1.342 | -0.304 | 3.018  | 0.1132   | 0.0271 |
| Salsolidine                           | H2O | 748  | 1.287 | -0.364 | 2.899  | 0.122    | 0.0292 |
| 4-Methoxybenzaldehyde                 | H2O | 901  | 1.233 | -0.367 | 2.726  | 0.118    | 0.0281 |
| Nerolidol                             | H2O | 781  | 1.138 | -0.413 | 2.689  | 0.1505   | 0.0307 |
| 2-Nonylquinolin-4(1H)-one (p)         | H2O | 803  | 1.093 | -0.502 | 2.622  | 0.1704   | 0.0313 |
| Caffeine                              | H2O | 859  | 1.008 | -0.528 | 2.521  | 0.1949   | 0.0339 |
| Agmatine                              | H2O | 764  | 0.996 | -0.63  | 2.591  | 0.2254   | 0.0349 |
| Rotenone (p)                          | H2O | 865  | 0.986 | -0.654 | 2.512  | 0.2219   | 0.0344 |
| Menthol                               | H2O | 928  | 0.941 | -0.662 | 2.471  | 0.2392   | 0.0354 |
| ^Citronellol                          | H2O | 767  | 0.861 | -0.705 | 2.391  | 0.2755   | 0.0359 |
| (+)-Carvone                           | H2O | 1052 | 0.704 | -0.733 | 2.151  | 0.3388   | 0.0375 |
| Spermidine                            | H2O | 977  | 0.486 | -1.046 | 2.016  | 0.5339   | 0.0391 |
| †Sitoglucoside (p)                    | H2O | 993  | 0.384 | -1.175 | 1.947  | 0.6297   | 0.0406 |
| Ajmalicine                            | H2O | 864  | 0.379 | -1.246 | 1.947  | 0.6417   | 0.0417 |
| Maslinic acid (p)                     | H2O | 879  | 0.373 | -1.208 | 1.963  | 0.6448   | 0.0427 |
| 5-Aminolevulinic acid (hydrochloride) | H2O | 838  | 0.36  | -1.164 | 1.883  | 0.6431   | 0.0422 |

|                             |     |      |        |        |        |          |        |
|-----------------------------|-----|------|--------|--------|--------|----------|--------|
| Nootkatone                  | H2O | 963  | 0.253  | -1.31  | 1.695  | 0.7414   | 0.0453 |
| Alyssin                     | H2O | 970  | 0.183  | -1.355 | 1.693  | 0.8141   | 0.0464 |
| Eucalyptol                  | H2O | 853  | 0.131  | -1.52  | 1.711  | 0.8737   | 0.0474 |
| Carnosic acid               | H2O | 797  | 0.116  | -1.503 | 1.752  | 0.8888   | 0.0479 |
| Skatole                     | H2O | 978  | 0.017  | -1.501 | 1.572  | 0.9822   | 0.0495 |
| trans-Anethole              | H2O | 963  | -0.072 | -1.68  | 1.456  | 0.9282   | 0.049  |
| Rosmarinic acid             | H2O | 802  | -0.1   | -1.654 | 1.485  | 0.9003   | 0.0484 |
| Vincristine (sulfate)       | H2O | 625  | -0.188 | -1.963 | 1.556  | 0.8341   | 0.0469 |
| Galanthamine                | H2O | 886  | -0.216 | -1.769 | 1.336  | 0.7856   | 0.0458 |
| L-Citrulline                | H2O | 883  | -0.289 | -1.882 | 1.252  | 0.7175   | 0.0448 |
| Salicylic acid              | H2O | 1058 | -0.336 | -1.861 | 1.087  | 0.6546   | 0.0438 |
| Bergapten (p)               | H2O | 806  | -0.339 | -2.005 | 1.31   | 0.6883   | 0.0443 |
| Deguelin (p)                | H2O | 972  | -0.367 | -1.87  | 1.199  | 0.639    | 0.0411 |
| trans-Cinnamaldehyde        | H2O | 879  | -0.375 | -1.989 | 1.223  | 0.6472   | 0.0432 |
| Curcumenol                  | H2O | 1068 | -0.473 | -1.981 | 1.022  | 0.537    | 0.0396 |
| Taurine                     | H2O | 1045 | -0.569 | -2.095 | 1.017  | 0.4732   | 0.0385 |
| Cafestol                    | H2O | 985  | -0.729 | -2.238 | 0.679  | 0.3274   | 0.037  |
| Pogostone                   | H2O | 1046 | -0.775 | -2.391 | 0.809  | 0.3428   | 0.038  |
| Loganin                     | H2O | 856  | -0.821 | -2.41  | 0.684  | 0.2982   | 0.0365 |
| Kaempferol                  | H2O | 928  | -0.998 | -2.493 | 0.486  | 0.1894   | 0.0328 |
| L-Ornithine                 | H2O | 999  | -1.028 | -2.636 | 0.465  | 0.1937   | 0.0333 |
| Anethole trithione (p)      | H2O | 908  | -1.047 | -2.616 | 0.412  | 0.1755   | 0.0323 |
| Carvacrol                   | H2O | 926  | -1.068 | -2.638 | 0.43   | 0.1723   | 0.0318 |
| Beta caryophyllene          | H2O | 935  | -1.168 | -2.683 | 0.244  | 0.1178   | 0.0276 |
| Germacrene D                | H2O | 1041 | -1.172 | -2.614 | 0.272  | 0.1113   | 0.0266 |
| Micheliolide                | H2O | 1158 | -1.18  | -2.724 | 0.364  | 0.1341   | 0.0302 |
| (-)-Borneol                 | H2O | 808  | -1.211 | -2.782 | 0.362  | 0.1311   | 0.0297 |
| Octyle acetate              | H2O | 867  | -1.293 | -2.994 | 0.255  | 0.1186   | 0.0286 |
| Myrcene                     | H2O | 859  | -1.341 | -2.95  | 0.272  | 0.1028   | 0.026  |
| p-Anisic acid               | H2O | 769  | -1.587 | -3.143 | -0.052 | 0.0442   | 0.0219 |
| Oleanolic acid (p)          | H2O | 1024 | -2.179 | -3.833 | -0.584 | 0.0086   | 0.0188 |
| †Daucosterol (p)            | H2O | 730  | -2.303 | -3.945 | -0.635 | 0.0064   | 0.0172 |
| Ethyl p-methoxycinnamate    | H2O | 804  | -2.314 | -3.919 | -0.7   | 0.0049   | 0.0167 |
| Methyl palmitate            | H2O | 751  | -2.397 | -3.896 | -0.89  | 0.0018   | 0.0146 |
| Safranal                    | H2O | 935  | -2.5   | -4.01  | -1.003 | 0.0011   | 0.0135 |
| Ursolic acid (p)            | H2O | 848  | -2.648 | -4.195 | -1.07  | 8.98E-04 | 0.013  |
| Camphor                     | H2O | 884  | -3.175 | -4.717 | -1.696 | 3.81E-05 | 0.0115 |
| Spinosad (p)                | H2O | 941  | -3.215 | -4.792 | -1.771 | 3.01E-05 | 0.0109 |
| Salvinorin A propionate (p) | H2O | 900  | -3.732 | -5.301 | -2.233 | 1.86E-06 | 0.0094 |
| Ellagic acid (p)            | H2O | 926  | -4.162 | -5.656 | -2.786 | 1.31E-08 | 0.0068 |
| 2-Nonanone                  | H2O | 890  | -4.994 | -6.571 | -3.473 | 2.63E-10 | 0.0047 |
| Phytol                      | H2O | 867  | -6.667 | -8.326 | -4.999 | 4.00E-15 | 0.0036 |
| 1-Octanol                   | H2O | 625  | -7.865 | -9.412 | -6.308 | 3.08E-23 | 0.0031 |
