# Supplementary material for: A high-throughput behavioral screening platform for measuring chemotaxis by C. elegans
Source: PubMed Central journal article supplement (PMC11210793; doi:10.1371/journal.pbio.3002672), 2024-06-27
Supplement: pbio.3002672.s005.pdf [file pbio.3002672.s005.pdf]

| Test compound             | Control | Test_n | Mean difference | CI_5   | CI_95  | Strain |
|---------------------------|---------|--------|-----------------|--------|--------|--------|
| (-)-Huperzine A           | DMSO    | 675    | 2.507           | 1.196  | 3.777  | PR678  |
| 1-octanol                 | DMSO    | 668    | -3.953          | -5.293 | -2.707 | PR678  |
| 2,3-Dihydrobenzofuran     | DMSO    | 670    | 6.791           | 5.382  | 8.233  | PR678  |
| 2,5-Dihydroxybenzoic acid | DMSO    | 998    | 1.257           | 0.015  | 2.37   | PR678  |
| 2-Methyl-1-butanol        | DMSO    | 640    | 1.723           | 0.325  | 3.059  | PR678  |
| 2-nonanone                | DMSO    | 767    | -6.326          | -7.514 | -5.134 | PR678  |
| Acetophenone              | DMSO    | 636    | -4.155          | -5.44  | -2.91  | PR678  |
| Anisole                   | DMSO    | 777    | 6.443           | 5.207  | 7.7    | PR678  |
| Camphor                   | DMSO    | 624    | 1.511           | 0.138  | 2.831  | PR678  |
| Carnosol                  | DMSO    | 635    | 6.716           | 5.223  | 8.15   | PR678  |
| Cinnamyl alcohol          | DMSO    | 727    | 4.824           | 3.422  | 6.117  | PR678  |
| Coumaran                  | DMSO    | 808    | 4.437           | 3.143  | 5.693  | PR678  |
| Daucosterol               | DMSO    | 673    | 4.354           | 3.02   | 5.66   | PR678  |
| Diacetyl                  | DMSO    | 738    | 12.024          | 10.764 | 13.222 | PR678  |
| Ellagic acid              | DMSO    | 671    | 3.74            | 2.417  | 5.034  | PR678  |
| Ethyl p-methoxycinnamate  | DMSO    | 620    | 0.164           | -1.115 | 1.435  | PR678  |
| Ethyl palmitate           | DMSO    | 681    | 2.073           | 0.764  | 3.35   | PR678  |
| Furfural                  | DMSO    | 574    | -1.76           | -3.071 | -0.422 | PR678  |
| Guaiazulene               | DMSO    | 593    | 1.399           | 0.053  | 2.774  | PR678  |
| Water                     | DMSO    | 523    | 3.816           | 2.391  | 5.156  | PR678  |
| Isoamyl alcohol           | DMSO    | 889    | 3.361           | 2.089  | 4.599  | PR678  |
| Isoquinoline              | DMSO    | 582    | 1.29            | 0.012  | 2.51   | PR678  |
| L-Mimosine                | DMSO    | 884    | 1.955           | 0.725  | 3.121  | PR678  |
| Lapachol                  | DMSO    | 640    | 3.359           | 2.046  | 4.713  | PR678  |
| Leonurine                 | DMSO    | 555    | 3.117           | 1.725  | 4.466  | PR678  |
| Limonin                   | DMSO    | 782    | 2.044           | 0.741  | 3.283  | PR678  |
| Methyl palmitate          | DMSO    | 798    | 3.058           | 1.888  | 4.282  | PR678  |
| Oleanolic acid            | DMSO    | 617    | 5.09            | 3.591  | 6.546  | PR678  |
| Paeoniflorin              | DMSO    | 595    | 2.592           | 1.236  | 3.957  | PR678  |
| Phenylacetylene           | DMSO    | 794    | 3.332           | 2.119  | 4.579  | PR678  |
| Phytol                    | DMSO    | 626    | 4.162           | 2.887  | 5.405  | PR678  |
| Piperitenone              | DMSO    | 863    | 5.808           | 4.469  | 7.081  | PR678  |
| Piperonyl Alcohol         | DMSO    | 615    | 2.855           | 1.46   | 4.164  | PR678  |
| Sabinene                  | DMSO    | 816    | 3.51            | 2.242  | 4.766  | PR678  |
| Salvinorin A Propionate   | DMSO    | 714    | 2.695           | 1.401  | 3.977  | PR678  |
| Sinomenine hydrochloride  | DMSO    | 673    | 3.462           | 2.183  | 4.745  | PR678  |
| Solasodine                | DMSO    | 790    | 4.739           | 3.416  | 5.97   | PR678  |
| Spinosad                  | DMSO    | 846    | 2.191           | 0.973  | 3.418  | PR678  |
| Thiophene                 | DMSO    | 620    | 2.925           | 1.572  | 4.242  | PR678  |
| Ursolic acid              | DMSO    | 559    | 3.597           | 2.163  | 4.994  | PR678  |
| p-Tolualdehyde            | DMSO    | 734    | -0.583          | -1.815 | 0.656  | PR678  |
| alpha-Phellandrene        | DMSO    | 879    | 2.643           | 1.416  | 3.875  | PR678  |
| (-)-Huperzine A           | DMSO    | 976    | 0.283           | -1.202 | 1.854  | CX10   |

|                           |      |      |        |        |        |        |
|---------------------------|------|------|--------|--------|--------|--------|
| 1-octanol                 | DMSO | 806  | -1.173 | -2.655 | 0.347  | CX10   |
| 2,3-Dihydrobenzofuran     | DMSO | 796  | 9.736  | 8.303  | 11.154 | CX10   |
| 2,5-Dihydroxybenzoic acid | DMSO | 840  | -1.52  | -3     | 0.088  | CX10   |
| 2-Methyl-1-butanol        | DMSO | 558  | 10.784 | 9.256  | 12.363 | CX10   |
| 2-nonanone                | DMSO | 861  | -3.745 | -5.229 | -2.16  | CX10   |
| Acetophenone              | DMSO | 1056 | 1.139  | -0.365 | 2.594  | CX10   |
| Anisole                   | DMSO | 760  | 4.987  | 3.459  | 6.677  | CX10   |
| Camphor                   | DMSO | 1049 | 1.568  | 0.083  | 3.055  | CX10   |
| Carnosol                  | DMSO | 974  | 1.664  | 0.193  | 3.204  | CX10   |
| Cinnamyl alcohol          | DMSO | 1007 | 1.396  | -0.085 | 2.902  | CX10   |
| Coumaran                  | DMSO | 987  | 2.801  | 1.304  | 4.346  | CX10   |
| Daucosterol               | DMSO | 1002 | 0.196  | -1.364 | 1.754  | CX10   |
| Diacetyl                  | DMSO | 861  | 3.998  | 2.468  | 5.489  | CX10   |
| Ellagic acid              | DMSO | 1042 | 0.994  | -0.526 | 2.439  | CX10   |
| Ethyl p-methoxycinnamate  | DMSO | 894  | 0.882  | -0.538 | 2.276  | CX10   |
| Ethyl palmitate           | DMSO | 815  | 0.388  | -1.19  | 1.952  | CX10   |
| Furfural                  | DMSO | 780  | 3.522  | 1.92   | 5.09   | CX10   |
| Guaiazulene               | DMSO | 861  | -2.027 | -3.497 | -0.525 | CX10   |
| Water                     | DMSO | 909  | 2.071  | 0.554  | 3.541  | CX10   |
| Isoamyl alcohol           | DMSO | 711  | 11.387 | 9.916  | 12.882 | CX10   |
| Isoquinoline              | DMSO | 994  | 1.71   | 0.223  | 3.175  | CX10   |
| L-Mimosine                | DMSO | 855  | 0.684  | -0.812 | 2.197  | CX10   |
| Lapachol                  | DMSO | 1126 | 0.36   | -1.049 | 1.817  | CX10   |
| Leonurine                 | DMSO | 1061 | -0.263 | -1.726 | 1.199  | CX10   |
| Limonin                   | DMSO | 973  | 2.249  | 0.792  | 3.709  | CX10   |
| Methyl palmitate          | DMSO | 952  | 1.587  | 0.087  | 3.159  | CX10   |
| Oleanolic acid            | DMSO | 908  | -1.868 | -3.371 | -0.368 | CX10   |
| Paeoniflorin              | DMSO | 825  | 4.498  | 2.976  | 6.031  | CX10   |
| Phenylacetylene           | DMSO | 768  | 5.656  | 4.108  | 7.252  | CX10   |
| Phytol                    | DMSO | 755  | 0.505  | -1.089 | 2.096  | CX10   |
| Piperitenone              | DMSO | 875  | 4.663  | 3.171  | 6.127  | CX10   |
| Piperonyl Alcohol         | DMSO | 962  | -4.272 | -5.744 | -2.766 | CX10   |
| Sabinene                  | DMSO | 939  | 1.9    | 0.345  | 3.413  | CX10   |
| Salvinorin A Propionate   | DMSO | 964  | -0.629 | -2.084 | 1      | CX10   |
| Sinomenine hydrochloride  | DMSO | 1028 | -1.037 | -2.516 | 0.471  | CX10   |
| Solasodine                | DMSO | 1051 | -0.543 | -2.039 | 0.908  | CX10   |
| Spinosad                  | DMSO | 895  | 0.993  | -0.553 | 2.536  | CX10   |
| Thiophene                 | DMSO | 897  | 1.565  | -0.022 | 3.119  | CX10   |
| Ursolic acid              | DMSO | 869  | 0.112  | -1.384 | 1.615  | CX10   |
| p-Tolualdehyde            | DMSO | 954  | 2.369  | 0.88   | 3.945  | CX10   |
| alpha-Phellandrene        | DMSO | 962  | 2.3    | 0.835  | 3.801  | CX10   |
| (-)-Huperzine A           | DMSO | 596  | -0.435 | -1.591 | 0.675  | GN1077 |
| 1-octanol                 | DMSO | 811  | -0.041 | -0.936 | 0.853  | GN1077 |
| 2,3-Dihydrobenzofuran     | DMSO | 851  | -1.425 | -2.399 | -0.482 | GN1077 |

|                           |      |      |        |        |        |        |
|---------------------------|------|------|--------|--------|--------|--------|
| 2,5-Dihydroxybenzoic acid | DMSO | 1024 | -0.758 | -1.629 | 0.081  | GN1077 |
| 2-Methyl-1-butanol        | DMSO | 434  | -2.09  | -3.444 | -0.752 | GN1077 |
| 2-nonanone                | DMSO | 709  | -2.109 | -3.044 | -1.217 | GN1077 |
| Acetophenone              | DMSO | 830  | -2.663 | -3.556 | -1.767 | GN1077 |
| Anisole                   | DMSO | 668  | -0.644 | -1.665 | 0.35   | GN1077 |
| Camphor                   | DMSO | 857  | -0.214 | -1.216 | 0.732  | GN1077 |
| Carnosol                  | DMSO | 693  | -0.379 | -1.344 | 0.546  | GN1077 |
| Cinnamyl alcohol          | DMSO | 554  | -0.529 | -1.719 | 0.685  | GN1077 |
| Coumaran                  | DMSO | 841  | -1.106 | -2.007 | -0.226 | GN1077 |
| Daucosterol               | DMSO | 642  | 1.867  | 0.797  | 2.996  | GN1077 |
| Diacetyl                  | DMSO | 836  | -0.553 | -1.417 | 0.351  | GN1077 |
| Ellagic acid              | DMSO | 887  | -0.999 | -1.885 | -0.117 | GN1077 |
| Ethyl p-methoxycinnamate  | DMSO | 784  | 0.348  | -0.571 | 1.248  | GN1077 |
| Ethyl palmitate           | DMSO | 961  | -1.321 | -2.299 | -0.361 | GN1077 |
| Furfural                  | DMSO | 733  | -1.74  | -2.628 | -0.835 | GN1077 |
| Guaiazulene               | DMSO | 873  | -0.761 | -1.726 | 0.256  | GN1077 |
| Water                     | DMSO | 784  | -1.167 | -2.06  | -0.277 | GN1077 |
| Isoamyl alcohol           | DMSO | 703  | -1.151 | -2.043 | -0.251 | GN1077 |
| Isoquinoline              | DMSO | 732  | -1.789 | -2.652 | -0.943 | GN1077 |
| L-Mimosine                | DMSO | 700  | 0.141  | -0.777 | 1.026  | GN1077 |
| Lapachol                  | DMSO | 632  | -1.912 | -2.954 | -0.914 | GN1077 |
| Leonurine                 | DMSO | 619  | -0.248 | -1.239 | 0.691  | GN1077 |
| Limonin                   | DMSO | 722  | -0.283 | -1.295 | 0.713  | GN1077 |
| Methyl palmitate          | DMSO | 656  | -1.244 | -2.16  | -0.294 | GN1077 |
| Oleanolic acid            | DMSO | 675  | -0.558 | -1.557 | 0.442  | GN1077 |
| Paeoniflorin              | DMSO | 664  | -1.207 | -2.325 | -0.14  | GN1077 |
| Phenylacetylene           | DMSO | 495  | -1.36  | -2.34  | -0.331 | GN1077 |
| Phytol                    | DMSO | 678  | -1.793 | -2.723 | -0.88  | GN1077 |
| Piperitenone              | DMSO | 747  | -0.641 | -1.638 | 0.328  | GN1077 |
| Piperonyl Alcohol         | DMSO | 745  | -1.812 | -2.737 | -0.91  | GN1077 |
| Sabinene                  | DMSO | 681  | -1.018 | -2.02  | 0.006  | GN1077 |
| Salvinorin A Propionate   | DMSO | 714  | -1.218 | -2.163 | -0.303 | GN1077 |
| Sinomenine hydrochloride  | DMSO | 897  | -1.688 | -2.576 | -0.775 | GN1077 |
| Solasodine                | DMSO | 702  | 1.259  | 0.214  | 2.336  | GN1077 |
| Spinosad                  | DMSO | 764  | 0.921  | -0.017 | 1.928  | GN1077 |
| Thiophene                 | DMSO | 861  | -1.322 | -2.201 | -0.448 | GN1077 |
| Ursolic acid              | DMSO | 868  | -1.521 | -2.45  | -0.639 | GN1077 |
| p-Tolualdehyde            | DMSO | 824  | -0.262 | -1.151 | 0.663  | GN1077 |
| alpha-Phellandrene        | DMSO | 764  | -1.078 | -2.012 | -0.176 | GN1077 |
