# Supplementary material for: A high-throughput behavioral screening platform for measuring chemotaxis by C. elegans
Source: PubMed Central journal article supplement (PMC11210793; doi:10.1371/journal.pbio.3002672), 2024-06-27
Supplement: pbio.3002672.s006.pdf [file pbio.3002672.s006.pdf]

| Test compound             | CI_5    | CI_95   | Delta-delta | Strain 1 | Strain 2 |
|---------------------------|---------|---------|-------------|----------|----------|
| (-)-Huperzine A           | -5.646  | -1.986  | -3.813      | GN1077   | N2       |
| 1-octanol                 | 5.703   | 9.104   | 7.406       | GN1077   | N2       |
| 2,3-Dihydrobenzofuran     | -12.331 | -8.728  | -10.619     | GN1077   | N2       |
| 2,5-Dihydroxybenzoic acid | -4.863  | -1.469  | -3.221      | GN1077   | N2       |
| 2-Methyl-1-butanol        | -15.918 | -11.621 | -13.802     | GN1077   | N2       |
| 2-nonanone                | 0.650   | 4.167   | 2.467       | GN1077   | N2       |
| Acetophenone              | -9.646  | -6.084  | -7.901      | GN1077   | N2       |
| Anisole                   | -5.446  | -1.800  | -3.661      | GN1077   | N2       |
| Camphor                   | 0.892   | 4.240   | 2.542       | GN1077   | N2       |
| Carnosol                  | -4.629  | -1.139  | -2.899      | GN1077   | N2       |
| Cinnamyl alcohol          | -5.274  | -1.386  | -3.342      | GN1077   | N2       |
| Coumaran                  | -7.705  | -4.306  | -6.037      | GN1077   | N2       |
| Daucosterol               | 1.864   | 5.701   | 3.751       | GN1077   | N2       |
| Diacetyl                  | -10.197 | -6.903  | -8.572      | GN1077   | N2       |
| Ellagic acid              | 1.123   | 4.446   | 2.745       | GN1077   | N2       |
| Ethyl p-methoxycinnamate  | 0.497   | 4.095   | 2.243       | GN1077   | N2       |
| Ethyl palmitate           | -5.656  | -2.052  | -3.895      | GN1077   | N2       |
| Furfural                  | -7.098  | -3.556  | -5.359      | GN1077   | N2       |
| Guaiazulene               | -6.765  | -3.375  | -5.065      | GN1077   | N2       |
| Water                     | -3.296  | 0.172   | -1.586      | GN1077   | N2       |
| Isoamyl alcohol           | -16.891 | -13.635 | -15.318     | GN1077   | N2       |
| Isoquinoline              | -7.372  | -3.885  | -5.597      | GN1077   | N2       |
| L-Mimosine                | -5.873  | -2.464  | -4.141      | GN1077   | N2       |
| Lapachol                  | -6.107  | -2.442  | -4.266      | GN1077   | N2       |
| Leonurine                 | -6.601  | -2.893  | -4.781      | GN1077   | N2       |
| Limonin                   | -4.947  | -1.293  | -3.106      | GN1077   | N2       |
| Methyl palmitate          | -0.995  | 2.428   | 0.735       | GN1077   | N2       |
| Oleanolic acid            | -0.559  | 3.098   | 1.202       | GN1077   | N2       |
| Paeoniflorin              | -8.606  | -4.582  | -6.588      | GN1077   | N2       |
| Phenylacetylene           | -9.823  | -5.740  | -7.810      | GN1077   | N2       |
| Phytol                    | 2.564   | 6.239   | 4.456       | GN1077   | N2       |
| Piperitenone              | -5.037  | -1.583  | -3.348      | GN1077   | N2       |
| Piperonyl alcohol         | -5.721  | -2.376  | -4.103      | GN1077   | N2       |
| Sabinene                  | -4.946  | -1.221  | -3.183      | GN1077   | N2       |
| Salvinorin A propionate   | 0.379   | 3.847   | 2.095       | GN1077   | N2       |
| Sinomenine hydrochloride  | -5.387  | -1.905  | -3.698      | GN1077   | N2       |
| Solasodine                | -4.383  | -0.653  | -2.561      | GN1077   | N2       |
| Spinosad                  | 2.014   | 5.509   | 3.717       | GN1077   | N2       |
| Thiophene                 | -12.779 | -9.263  | -11.082     | GN1077   | N2       |
| Ursolic acid              | -1.001  | 2.501   | 0.708       | GN1077   | N2       |
| p-Tolualdehyde            | -4.384  | -0.951  | -2.667      | GN1077   | N2       |
| alpha-Phellandrene        | -8.231  | -4.663  | -6.446      | GN1077   | N2       |
| (-)-Huperzine A           | -2.809  | 1.108   | -0.871      | PR678    | N2       |

|                           |         |        |         |       |    |
|---------------------------|---------|--------|---------|-------|----|
| 1-octanol                 | 1.517   | 5.433  | 3.493   | PR678 | N2 |
| 2,3-Dihydrobenzofuran     | -4.525  | -0.344 | -2.403  | PR678 | N2 |
| 2,5-Dihydroxybenzoic acid | -3.010  | 0.670  | -1.206  | PR678 | N2 |
| 2-Methyl-1-butanol        | -12.184 | -7.739 | -9.990  | PR678 | N2 |
| 2-nonanone                | -3.715  | 0.142  | -1.750  | PR678 | N2 |
| Acetophenone              | -11.459 | -7.467 | -9.394  | PR678 | N2 |
| Anisole                   | 1.402   | 5.390  | 3.427   | PR678 | N2 |
| Camphor                   | 2.323   | 6.192  | 4.268   | PR678 | N2 |
| Carnosol                  | 2.075   | 6.238  | 4.195   | PR678 | N2 |
| Cinnamyl alcohol          | -0.030  | 4.002  | 2.010   | PR678 | N2 |
| Coumaran                  | -2.388  | 1.468  | -0.494  | PR678 | N2 |
| Daucosterol               | 4.115   | 8.281  | 6.238   | PR678 | N2 |
| Diacetyl                  | 2.148   | 5.876  | 4.005   | PR678 | N2 |
| Ellagic acid              | 5.569   | 9.359  | 7.484   | PR678 | N2 |
| Ethyl p-methoxycinnamate  | 0.070   | 4.004  | 2.059   | PR678 | N2 |
| Ethyl palmitate           | -2.587  | 1.507  | -0.502  | PR678 | N2 |
| Furfural                  | -7.417  | -3.388 | -5.379  | PR678 | N2 |
| Guaiazulene               | -4.775  | -0.936 | -2.906  | PR678 | N2 |
| Water                     | 1.276   | 5.399  | 3.397   | PR678 | N2 |
| Isoamyl alcohol           | -12.602 | -8.954 | -10.806 | PR678 | N2 |
| Isoquinoline              | -4.569  | -0.603 | -2.518  | PR678 | N2 |
| L-Mimosine                | -4.180  | -0.435 | -2.327  | PR678 | N2 |
| Lapachol                  | -1.057  | 3.038  | 1.005   | PR678 | N2 |
| Leonurine                 | -3.443  | 0.623  | -1.417  | PR678 | N2 |
| Limonin                   | -2.736  | 1.142  | -0.779  | PR678 | N2 |
| Methyl palmitate          | 3.110   | 6.904  | 5.036   | PR678 | N2 |
| Oleanolic acid            | 4.736   | 9.125  | 6.850   | PR678 | N2 |
| Paeoniflorin              | -4.926  | -0.601 | -2.790  | PR678 | N2 |
| Phenylacetylene           | -5.255  | -0.906 | -3.118  | PR678 | N2 |
| Phytol                    | 8.329   | 12.420 | 10.411  | PR678 | N2 |
| Piperitenone              | 1.115   | 4.972  | 3.102   | PR678 | N2 |
| Piperonyl alcohol         | -1.424  | 2.442  | 0.564   | PR678 | N2 |
| Sabinene                  | -0.597  | 3.329  | 1.345   | PR678 | N2 |
| Salvinorin A propionate   | 4.027   | 7.908  | 6.008   | PR678 | N2 |
| Sinomenine hydrochloride  | -0.508  | 3.345  | 1.451   | PR678 | N2 |
| Solasodine                | -1.131  | 2.879  | 0.919   | PR678 | N2 |
| Spinosad                  | 3.095   | 6.850  | 4.988   | PR678 | N2 |
| Thiophene                 | -8.857  | -4.802 | -6.835  | PR678 | N2 |
| Ursolic acid              | 3.812   | 7.798  | 5.826   | PR678 | N2 |
| p-Tolualdehyde            | -4.845  | -1.121 | -2.989  | PR678 | N2 |
| alpha-Phellandrene        | -4.737  | -0.741 | -2.724  | PR678 | N2 |
| (-)-Huperzine A           | -5.213  | -1.065 | -3.095  | CX10  | N2 |
| 1-octanol                 | 4.203   | 8.333  | 6.273   | CX10  | N2 |
| 2,3-Dihydrobenzofuran     | -1.635  | 2.671  | 0.541   | CX10  | N2 |

|                           |         |        |        |       |        |
|---------------------------|---------|--------|--------|-------|--------|
| 2,5-Dihydroxybenzoic acid | -6.129  | -1.903 | -3.983 | CX10  | N2     |
| 2-Methyl-1-butanol        | -3.197  | 1.362  | -0.928 | CX10  | N2     |
| 2-nonanone                | -1.315  | 3.008  | 0.831  | CX10  | N2     |
| Acetophenone              | -6.177  | -2.017 | -4.099 | CX10  | N2     |
| Anisole                   | -0.221  | 4.231  | 1.970  | CX10  | N2     |
| Camphor                   | 2.280   | 6.359  | 4.324  | CX10  | N2     |
| Carnosol                  | -3.022  | 1.225  | -0.856 | CX10  | N2     |
| Cinnamyl alcohol          | -3.580  | 0.644  | -1.418 | CX10  | N2     |
| Coumaran                  | -4.180  | -0.009 | -2.130 | CX10  | N2     |
| Daucosterol               | -0.144  | 4.308  | 2.080  | CX10  | N2     |
| Diacetyl                  | -6.107  | -1.996 | -4.021 | CX10  | N2     |
| Ellagic acid              | 2.735   | 6.760  | 4.738  | CX10  | N2     |
| Ethyl p-methoxycinnamate  | 0.685   | 4.852  | 2.777  | CX10  | N2     |
| Ethyl palmitate           | -4.409  | -0.031 | -2.186 | CX10  | N2     |
| Furfural                  | -2.271  | 2.250  | -0.098 | CX10  | N2     |
| Guaiazulene               | -8.349  | -4.327 | -6.332 | CX10  | N2     |
| Water                     | -0.388  | 3.812  | 1.653  | CX10  | N2     |
| Isoamyl alcohol           | -4.732  | -0.853 | -2.780 | CX10  | N2     |
| Isoquinoline              | -4.141  | 0.103  | -2.097 | CX10  | N2     |
| L-Mimosine                | -5.719  | -1.428 | -3.598 | CX10  | N2     |
| Lapachol                  | -4.117  | 0.182  | -1.994 | CX10  | N2     |
| Leonurine                 | -6.955  | -2.730 | -4.797 | CX10  | N2     |
| Limonin                   | -2.688  | 1.552  | -0.574 | CX10  | N2     |
| Methyl palmitate          | 1.487   | 5.699  | 3.565  | CX10  | N2     |
| Oleanolic acid            | -2.342  | 2.020  | -0.108 | CX10  | N2     |
| Paeoniflorin              | -3.276  | 1.384  | -0.883 | CX10  | N2     |
| Phenylacetylene           | -3.213  | 1.545  | -0.794 | CX10  | N2     |
| Phytol                    | 4.498   | 9.074  | 6.754  | CX10  | N2     |
| Piperitenone              | -0.086  | 3.927  | 1.956  | CX10  | N2     |
| Piperonyl alcohol         | -8.682  | -4.569 | -6.562 | CX10  | N2     |
| Sabinene                  | -2.479  | 1.883  | -0.265 | CX10  | N2     |
| Salvinorin A propionate   | 0.553   | 4.783  | 2.685  | CX10  | N2     |
| Sinomenine hydrochloride  | -5.159  | -0.922 | -3.047 | CX10  | N2     |
| Solasodine                | -6.434  | -2.189 | -4.364 | CX10  | N2     |
| Spinosad                  | 1.710   | 5.986  | 3.790  | CX10  | N2     |
| Thiophene                 | -10.251 | -5.991 | -8.195 | CX10  | N2     |
| Ursolic acid              | 0.150   | 4.442  | 2.341  | CX10  | N2     |
| p-Tolualdehyde            | -2.042  | 2.114  | -0.036 | CX10  | N2     |
| alpha-Phellandrene        | -5.219  | -1.024 | -3.068 | CX10  | N2     |
| (-)-Huperzine A           | -4.772  | -1.283 | -2.941 | PR678 | GN1077 |
| 1-octanol                 | 2.371   | 5.513  | 3.912  | PR678 | GN1077 |
| 2,3-Dihydrobenzofuran     | -9.946  | -6.539 | -8.216 | PR678 | GN1077 |
| 2,5-Dihydroxybenzoic acid | -3.459  | -0.520 | -2.015 | PR678 | GN1077 |
| 2-Methyl-1-butanol        | -5.712  | -1.911 | -3.813 | PR678 | GN1077 |

|                           |         |         |         |       |        |
|---------------------------|---------|---------|---------|-------|--------|
| 2-nonanone                | 2.761   | 5.709   | 4.217   | PR678 | GN1077 |
| Acetophenone              | -0.111  | 3.047   | 1.492   | PR678 | GN1077 |
| Anisole                   | -8.630  | -5.376  | -7.088  | PR678 | GN1077 |
| Camphor                   | -3.367  | 0.009   | -1.725  | PR678 | GN1077 |
| Carnosol                  | -8.770  | -5.264  | -7.094  | PR678 | GN1077 |
| Cinnamyl alcohol          | -7.148  | -3.597  | -5.352  | PR678 | GN1077 |
| Coumaran                  | -7.063  | -3.995  | -5.543  | PR678 | GN1077 |
| Daucosterol               | -4.257  | -0.676  | -2.487  | PR678 | GN1077 |
| Diacetyl                  | -14.111 | -11.054 | -12.577 | PR678 | GN1077 |
| Ellagic acid              | -6.234  | -3.106  | -4.739  | PR678 | GN1077 |
| Ethyl p-methoxycinnamate  | -1.374  | 1.684   | 0.184   | PR678 | GN1077 |
| Ethyl palmitate           | -5.069  | -1.838  | -3.393  | PR678 | GN1077 |
| Furfural                  | -1.545  | 1.674   | 0.020   | PR678 | GN1077 |
| Guaiazulene               | -3.798  | -0.470  | -2.159  | PR678 | GN1077 |
| Water                     | -6.680  | -3.359  | -4.983  | PR678 | GN1077 |
| Isoamyl alcohol           | -6.042  | -2.955  | -4.512  | PR678 | GN1077 |
| Isoquinoline              | -4.604  | -1.533  | -3.079  | PR678 | GN1077 |
| L-Mimosine                | -3.361  | -0.275  | -1.814  | PR678 | GN1077 |
| Lapachol                  | -6.917  | -3.553  | -5.271  | PR678 | GN1077 |
| Leonurine                 | -5.000  | -1.681  | -3.364  | PR678 | GN1077 |
| Limonin                   | -3.985  | -0.714  | -2.327  | PR678 | GN1077 |
| Methyl palmitate          | -5.803  | -2.732  | -4.301  | PR678 | GN1077 |
| Oleanolic acid            | -7.381  | -3.858  | -5.648  | PR678 | GN1077 |
| Paeoniflorin              | -5.495  | -2.068  | -3.799  | PR678 | GN1077 |
| Phenylacetylene           | -6.283  | -3.075  | -4.692  | PR678 | GN1077 |
| Phytol                    | -7.554  | -4.319  | -5.955  | PR678 | GN1077 |
| Piperitenone              | -8.009  | -4.797  | -6.449  | PR678 | GN1077 |
| Piperonyl alcohol         | -6.288  | -2.974  | -4.667  | PR678 | GN1077 |
| Sabinene                  | -6.194  | -2.885  | -4.528  | PR678 | GN1077 |
| Salvinorin A propionate   | -5.504  | -2.305  | -3.913  | PR678 | GN1077 |
| Sinomenine hydrochloride  | -6.658  | -3.583  | -5.149  | PR678 | GN1077 |
| Solasodine                | -5.099  | -1.824  | -3.480  | PR678 | GN1077 |
| Spinosad                  | -2.824  | 0.308   | -1.271  | PR678 | GN1077 |
| Thiophene                 | -5.878  | -2.674  | -4.247  | PR678 | GN1077 |
| Ursolic acid              | -6.774  | -3.432  | -5.118  | PR678 | GN1077 |
| p-Tolualdehyde            | -1.161  | 1.777   | 0.322   | PR678 | GN1077 |
| alpha-Phellandrene        | -5.241  | -2.219  | -3.721  | PR678 | GN1077 |
| (-)-Huperzine A           | -2.618  | 1.119   | -0.717  | CX10  | GN1077 |
| 1-octanol                 | -0.646  | 2.898   | 1.133   | CX10  | GN1077 |
| 2,3-Dihydrobenzofuran     | -12.855 | -9.444  | -11.160 | CX10  | GN1077 |
| 2,5-Dihydroxybenzoic acid | -0.970  | 2.539   | 0.762   | CX10  | GN1077 |
| 2-Methyl-1-butanol        | -14.822 | -10.784 | -12.874 | CX10  | GN1077 |
| 2-nonanone                | -0.170  | 3.413   | 1.635   | CX10  | GN1077 |
| Acetophenone              | -5.537  | -2.078  | -3.802  | CX10  | GN1077 |

|                           |         |         |         |       |        |
|---------------------------|---------|---------|---------|-------|--------|
| Anisole                   | -7.440  | -3.651  | -5.631  | CX10  | GN1077 |
| Camphor                   | -3.642  | -0.042  | -1.782  | CX10  | GN1077 |
| Carnosol                  | -3.848  | -0.309  | -2.043  | CX10  | GN1077 |
| Cinnamyl alcohol          | -3.895  | 0.026   | -1.925  | CX10  | GN1077 |
| Coumaran                  | -5.670  | -2.195  | -3.907  | CX10  | GN1077 |
| Daucosterol               | -0.218  | 3.641   | 1.671   | CX10  | GN1077 |
| Diacetyl                  | -6.293  | -2.774  | -4.551  | CX10  | GN1077 |
| Ellagic acid              | -3.698  | -0.271  | -1.993  | CX10  | GN1077 |
| Ethyl p-methoxycinnamate  | -2.211  | 1.210   | -0.534  | CX10  | GN1077 |
| Ethyl palmitate           | -3.598  | 0.060   | -1.709  | CX10  | GN1077 |
| Furfural                  | -7.132  | -3.403  | -5.261  | CX10  | GN1077 |
| Guaiazulene               | -0.554  | 3.086   | 1.267   | CX10  | GN1077 |
| Water                     | -4.998  | -1.528  | -3.238  | CX10  | GN1077 |
| Isoamyl alcohol           | -14.353 | -10.877 | -12.539 | CX10  | GN1077 |
| Isoquinoline              | -5.278  | -1.825  | -3.500  | CX10  | GN1077 |
| L-Mimosine                | -2.437  | 1.233   | -0.543  | CX10  | GN1077 |
| Lapachol                  | -4.096  | -0.489  | -2.272  | CX10  | GN1077 |
| Leonurine                 | -1.738  | 1.729   | 0.016   | CX10  | GN1077 |
| Limonin                   | -4.352  | -0.673  | -2.533  | CX10  | GN1077 |
| Methyl palmitate          | -4.686  | -1.065  | -2.830  | CX10  | GN1077 |
| Oleanolic acid            | -0.549  | 3.213   | 1.310   | CX10  | GN1077 |
| Paeoniflorin              | -7.549  | -3.719  | -5.705  | CX10  | GN1077 |
| Phenylacetylene           | -8.885  | -5.164  | -7.016  | CX10  | GN1077 |
| Phytol                    | -4.060  | -0.439  | -2.298  | CX10  | GN1077 |
| Piperitenone              | -7.161  | -3.527  | -5.304  | CX10  | GN1077 |
| Piperonyl alcohol         | 0.671   | 4.304   | 2.460   | CX10  | GN1077 |
| Sabinene                  | -4.740  | -1.101  | -2.918  | CX10  | GN1077 |
| Salvinorin A propionate   | -2.434  | 1.121   | -0.589  | CX10  | GN1077 |
| Sinomenine hydrochloride  | -2.388  | 1.127   | -0.651  | CX10  | GN1077 |
| Solasodine                | -0.057  | 3.643   | 1.802   | CX10  | GN1077 |
| Spinosad                  | -1.881  | 1.756   | -0.073  | CX10  | GN1077 |
| Thiophene                 | -4.654  | -1.154  | -2.887  | CX10  | GN1077 |
| Ursolic acid              | -3.456  | 0.124   | -1.633  | CX10  | GN1077 |
| p-Tolualdehyde            | -4.475  | -0.856  | -2.631  | CX10  | GN1077 |
| alpha-Phellandrene        | -5.144  | -1.670  | -3.378  | CX10  | GN1077 |
| (-)-Huperzine A           | 0.220   | 4.187   | 2.224   | PR678 | CX10   |
| 1-octanol                 | -4.800  | -0.794  | -2.780  | PR678 | CX10   |
| 2,3-Dihydrobenzofuran     | -4.904  | -0.886  | -2.945  | PR678 | CX10   |
| 2,5-Dihydroxybenzoic acid | 0.804   | 4.744   | 2.777   | PR678 | CX10   |
| 2-Methyl-1-butanol        | -11.208 | -7.054  | -9.061  | PR678 | CX10   |
| 2-nonanone                | -4.520  | -0.652  | -2.581  | PR678 | CX10   |
| Acetophenone              | -7.218  | -3.342  | -5.294  | PR678 | CX10   |
| Anisole                   | -0.673  | 3.477   | 1.456   | PR678 | CX10   |
| Camphor                   | -2.101  | 1.970   | -0.057  | PR678 | CX10   |

|                          |        |        |        |       |      |
|--------------------------|--------|--------|--------|-------|------|
| Carnosol                 | 2.982  | 7.124  | 5.051  | PR678 | CX10 |
| Cinnamyl alcohol         | 1.390  | 5.459  | 3.427  | PR678 | CX10 |
| Coumaran                 | -0.321 | 3.635  | 1.636  | PR678 | CX10 |
| Daucosterol              | 2.109  | 6.191  | 4.158  | PR678 | CX10 |
| Diacetyl                 | 6.081  | 10.037 | 8.026  | PR678 | CX10 |
| Ellagic acid             | 0.781  | 4.800  | 2.746  | PR678 | CX10 |
| Ethyl p-methoxycinnamate | -2.571 | 1.156  | -0.717 | PR678 | CX10 |
| Ethyl palmitate          | -0.395 | 3.780  | 1.685  | PR678 | CX10 |
| Furfural                 | -7.343 | -3.180 | -5.281 | PR678 | CX10 |
| Guaiazulene              | 1.403  | 5.540  | 3.426  | PR678 | CX10 |
| Water                    | -0.347 | 3.850  | 1.744  | PR678 | CX10 |
| Isoamyl alcohol          | -9.929 | -6.063 | -8.026 | PR678 | CX10 |
| Isoquinoline             | -2.388 | 1.458  | -0.420 | PR678 | CX10 |
| L-Mimosine               | -0.761 | 3.221  | 1.271  | PR678 | CX10 |
| Lapachol                 | 1.013  | 4.985  | 2.999  | PR678 | CX10 |
| Leonurine                | 1.325  | 5.447  | 3.380  | PR678 | CX10 |
| Limonin                  | -2.115 | 1.766  | -0.205 | PR678 | CX10 |
| Methyl palmitate         | -0.473 | 3.347  | 1.471  | PR678 | CX10 |
| Oleanolic acid           | 4.797  | 8.986  | 6.958  | PR678 | CX10 |
| Paeoniflorin             | -3.982 | 0.135  | -1.906 | PR678 | CX10 |
| Phenylacetylene          | -4.399 | -0.214 | -2.324 | PR678 | CX10 |
| Phytol                   | 1.591  | 5.681  | 3.657  | PR678 | CX10 |
| Piperitenone             | -0.810 | 3.189  | 1.145  | PR678 | CX10 |
| Piperonyl alcohol        | 5.147  | 9.211  | 7.126  | PR678 | CX10 |
| Sabinene                 | -0.340 | 3.541  | 1.610  | PR678 | CX10 |
| Salvinorin A propionate  | 1.233  | 5.282  | 3.323  | PR678 | CX10 |
| Sinomenine hydrochloride | 2.538  | 6.469  | 4.499  | PR678 | CX10 |
| Solasodine               | 3.299  | 7.206  | 5.282  | PR678 | CX10 |
| Spinosad                 | -0.799 | 3.237  | 1.198  | PR678 | CX10 |
| Thiophene                | -0.665 | 3.438  | 1.360  | PR678 | CX10 |
| Ursolic acid             | 1.355  | 5.499  | 3.485  | PR678 | CX10 |
| p-Tolualdehyde           | -4.820 | -0.908 | -2.953 | PR678 | CX10 |
| alpha-Phellandrene       | -1.586 | 2.268  | 0.343  | PR678 | CX10 |
